# Supplementary material for: Two hexaazatriphenylene-pyrene based Hg2+ fluorescent chemosensors applicable for test paper detection
Source: Royal Society of Chemistry journal article supplement (doi:10.1039/c4nj01928h), 2015-01-01
Supplement: c4nj01928h1.pdf [file c4nj01928h1.pdf]

## **Electronic Supplementary Information (ESI)**

### **Two hexaazatriphenylene-pyrene based Hg<sup>2+</sup> fluorescent chemosensors applicable to test paper detection**

**Yue Li, Le-Le Yang, Kun Liu, Fang-Yao Zhao, Huan Liu, Wen-Juan Ruan\***

*Department of Chemistry and Collaborative Innovation Center of Chemical Science and  
Engineering (Tianjin), Nankai University, Tianjin 300071, China.*

*Email: wjruan@nankai.edu.cn; Tel: (+86)-22-23501717*

## Experimental

### 1. Materials and general methods

All the starting reagents and chemicals were purchased from commercial sources and used as received. Intermediates 2,7-di-tert-butylpyrene-4,5,9,10-tetraone, 2,7-di-tert-butylpyrene-4,5-dione and 2,3,8,9-tetraphenylpyrazino[2,3-f]quinoxaline-5,6-diamine were prepared according to literature procedures.<sup>1-3</sup> The solvents used for fluorescence measurements were purified by standard procedures. <sup>1</sup>H NMR spectra were recorded in CDCl<sub>3</sub> on a Bruker 300 MHz NMR spectrometer. High-resolution mass spectra were measured on an IonSpec 7.0T FT-ICR mass spectrometer. IR spectra were recorded on a TENSOR 27 OPUS Fourier transform infrared (FT-IR) spectrometer (Bruker) in the range of 4000–400 cm<sup>-1</sup> using KBr disks dispersed with sample powders. Elemental analyses (C, H, and N) were tested using a Perkin-Elmer 240C analyzer. Fluorescence spectra were measured at room temperature on a Varian Cary Eclipse fluorescence spectrometer. UV-vis absorption spectra were recorded by a Shimadzu UV-2450 UV-vis spectrophotometer.

### 2. Characterization data of compound 1

<sup>1</sup>H NMR (300 MHz, CDCl<sub>3</sub>):  $\delta$  (ppm) 1.67 (s, 18H), 7.46 (s, 24H), 7.92 (q, 8H), 7.99 (q, 8H), 8.76 (d, 2H), 10.07 (d, 2H). <sup>13</sup>C NMR (300 MHz, CDCl<sub>3</sub>):  $\delta$  (ppm) 31.98, 36.65, 128.50, 128.64, 129.85, 130.34, 138.27, 138.33, 139.36, 139.72, 141.28, 141.79, 152.46, 153.50, 154.35. MS-ESI calcd. for C<sub>92</sub>H<sub>63</sub>N<sub>12</sub> [M + H]<sup>+</sup> 1336.5, found 1336.5. Anal. Calcd. for C<sub>92</sub>H<sub>64</sub>N<sub>12</sub>•2H<sub>2</sub>O: C, 80.56; H, 5.58; N, 12.25%; Found: C, 80.41; H, 5.47; N, 12.14%. IR (KBr, cm<sup>-1</sup>): 3132, 2917, 2849, 1586, 1472, 1369, 1247, 788, 594, 548.

### 3. Characterization data of compound 2

<sup>1</sup>H NMR (300 MHz, CD<sub>3</sub>Cl):  $\delta$  (ppm) 1.75 (s, 18H), 7.46 (m, 12H), 7.93 (m, 4H), 8.05 (m, 6H), 8.38 (s, 2H), 10.03 (s, 2H). <sup>13</sup>C NMR (300 MHz, CDCl<sub>3</sub>):  $\delta$  (ppm) 32.73, 36.55, 122.01, 124.66, 127.40, 128.48, 128.62, 129.68, 130.38, 131.24, 138.58, 139.38, 139.86, 140.68, 144.25, 149.70, 153.41, 153.87. MS-ESI calcd. for C<sub>58</sub>H<sub>45</sub>N<sub>6</sub> [M + H]<sup>+</sup> 825.4, found 825.8; calcd. for C<sub>116</sub>H<sub>89</sub>N<sub>12</sub> [2M + H]<sup>+</sup> 1650.7, found 1649.4. Anal. Calcd. for C<sub>58</sub>H<sub>44</sub>N<sub>6</sub>•3H<sub>2</sub>O: C, 79.25; H, 5.73; N, 9.56%; Found: C, 79.14; H, 5.76; N, 9.18%. IR (KBr, cm<sup>-1</sup>): 3441, 3056, 2951, 1586, 1473, 1370, 905, 741, 695, 594.

**Table S1** The Hg<sup>2+</sup> responsive chemosensors reported in recent years (2012-2014)

| Entry | Chromophore                           | Detection limit (nM)                 | Ref.      |
|-------|---------------------------------------|--------------------------------------|-----------|
| 1     | pyrene-hexaazatriphenylene            | 2.8 for <b>1</b><br>3.1 for <b>2</b> | This work |
| 2     | acridinedione                         | 2                                    | 4         |
| 3     | anthracene and pyrene                 | 2–4                                  | 5         |
| 4     | rhodamine                             | 3                                    | 6         |
| 5     | rhodamine B                           | 5.9                                  | 7         |
| 6     | pyrene                                | 22                                   | 8         |
| 7     | phenanthroimidazole                   | 25                                   | 9         |
| 8     | BODIPY                                | 27                                   | 10        |
| 9     | 1-aminoanthraquinone                  | 50                                   | 11        |
| 10    | rhodamine B and hexaphenylbenzene     | 50–100                               | 12        |
| 11    | dansyl                                | 50–250                               | 13        |
| 12    | pyrene                                | 74                                   | 14        |
| 13    | 7-methoxycoumarin                     | 200–315                              | 15        |
| 14    | BODIPY                                | 226                                  | 16        |
| 15    | naphthalene                           | 230                                  | 17        |
| 16    | pyrene                                | 510–2400                             | 18        |
| 17    | 10-ethylphenothiazine                 | 906                                  | 19        |
| 18    | Tetraphenylethene and benzothiazolium | 1000                                 | 20        |
| 19    | quinazoline                           | 1500                                 | 21        |
| 20    | nitrobenzoxadiazole                   | 1500                                 | 22        |
| 21    | anthracene and oxyquinoline           | 3200                                 | 23        |
| 22    | BODIPY                                | 10000                                | 24        |
| 23    | BODIPY                                | 15000                                | 25        |
| 24    | BODIPY                                | Not given                            | 26        |

**Table S2** The energies of the frontier orbitals of compound **1** and **2**

| Compound | HOMO (eV) | LUMO (eV) | LUMO – HOMO (eV) |
|----------|-----------|-----------|------------------|
| <b>1</b> | -5.663    | -2.281    | 3.383            |
| <b>2</b> | -5.462    | -2.187    | 3.274            |

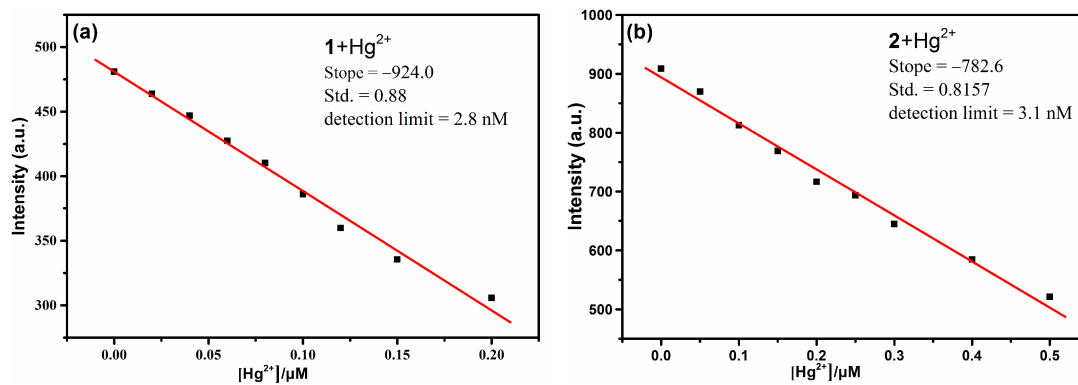

**Fig. S1** Linear emission intensity change of (a) **1** and (b) **2** as a function of  $\text{Hg}^{2+}$  concentration.  $\lambda_{\text{em}}$  is 459 nm for **1** and 529 nm for **2**.

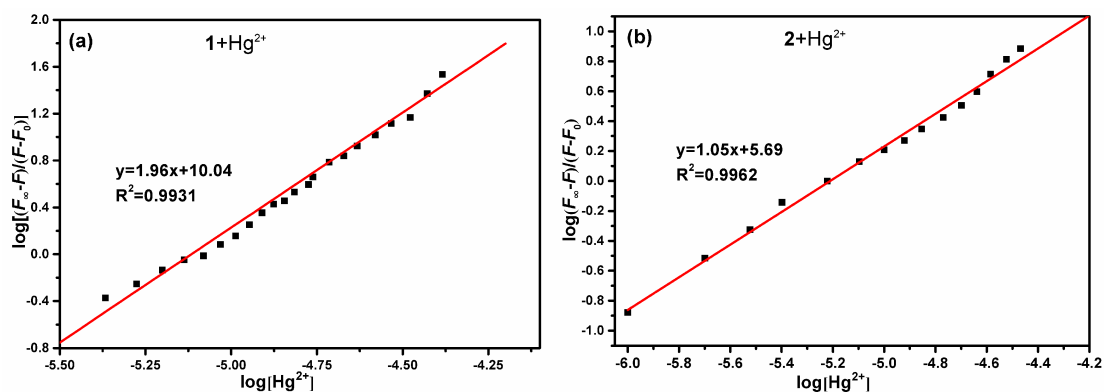

**Fig. S2** The linear fitting of fluorescence intensity change with  $\log[(F_{\infty}-F)/(F-F_0)] = n\log[\text{Hg}^{2+}] + \log\beta$ .  $n$  is the complex-ratio of **1** or **2** to  $\text{Hg}^{2+}$ ,  $\beta$  is the stability constant of the formed complex,  $F_0$ ,  $F$  and  $F_{\infty}$  are the fluorescence intensities of the solution of **1** or **2** after the addition of none, a given amount and excess amount of  $\text{Hg}^{2+}$ , respectively. (a)  $[\mathbf{1}] = 10 \mu\text{M}$ ,  $\lambda_{\text{em}} = 459 \text{ nm}$ . (b)  $[\mathbf{2}] = 10 \mu\text{M}$ ,  $\lambda_{\text{em}} = 529 \text{ nm}$ .

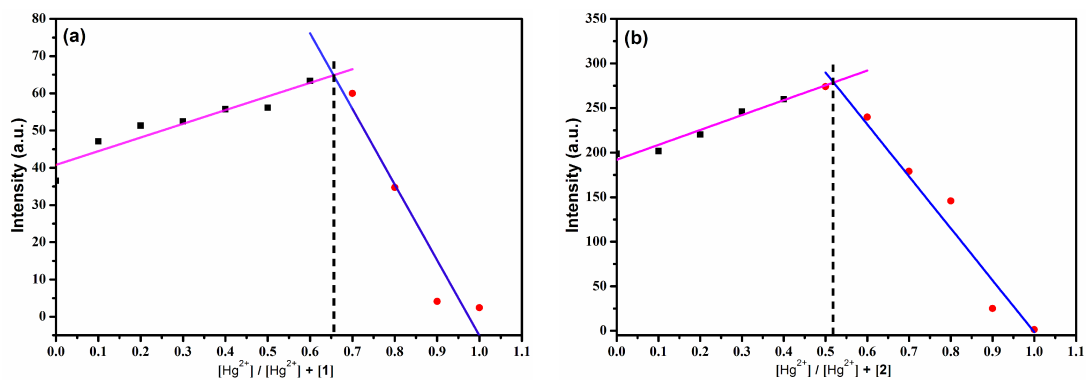

**Fig. S3** Job's plots of (a) **1** and (b) **2** to  $\text{Hg}^{2+}$  in  $\text{CH}_3\text{CN-H}_2\text{O}$  ( $v/v = 9/1$ ) media obtained by fluorescence measurements.

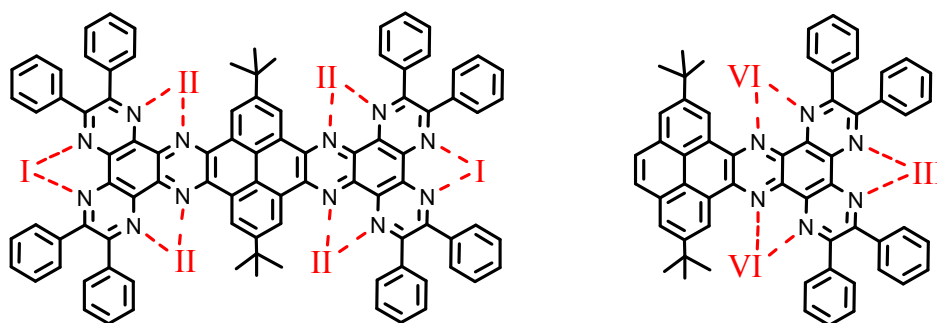

**Fig. S4** Possible binding sites of compounds **1** and **2**.

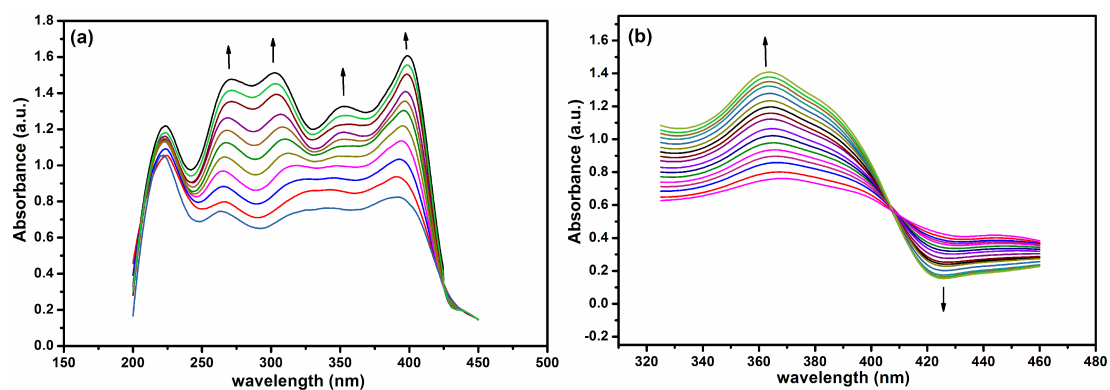

**Fig. S5** Absorption spectra of (a) **1** ( $50 \mu\text{M}$ ) and (b) **2** ( $50 \mu\text{M}$ ) in  $\text{CH}_3\text{CN-H}_2\text{O}$  ( $v/v = 9/1$ ) media upon the addition of  $\text{Hg}^{2+}$  ( $0\text{--}220 \mu\text{M}$  for **1** and  $0\text{--}500 \mu\text{M}$  for **2**).

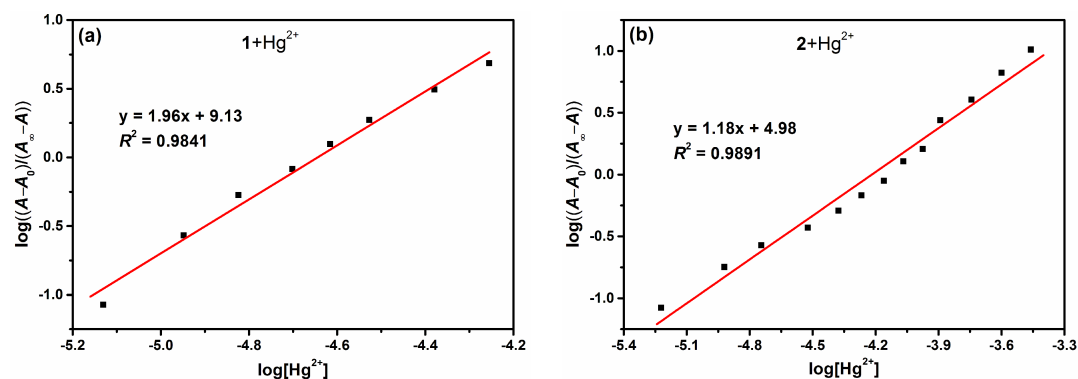

**Fig. S6** The linear fitting of absorbance change with  $\log[(A_{\infty}-A)/(A-A_0)] = n\log[\text{Hg}^{2+}] + \log\beta$ .  $n$  is the complex-ratio of **1** or **2** to  $\text{Hg}^{2+}$ ,  $\beta$  is the stability constant of the formed complex,  $A_0$ ,  $A$  and  $A_{\infty}$  are the absorbances of the solution of **1** or **2** after the addition of none, a given amount and excess amount of  $\text{Hg}^{2+}$ , respectively. (a) [**1**] = 50  $\mu\text{M}$ ,  $\lambda = 399$  nm. (b) [**2**] = 50  $\mu\text{M}$ ,  $\lambda = 364$  nm.

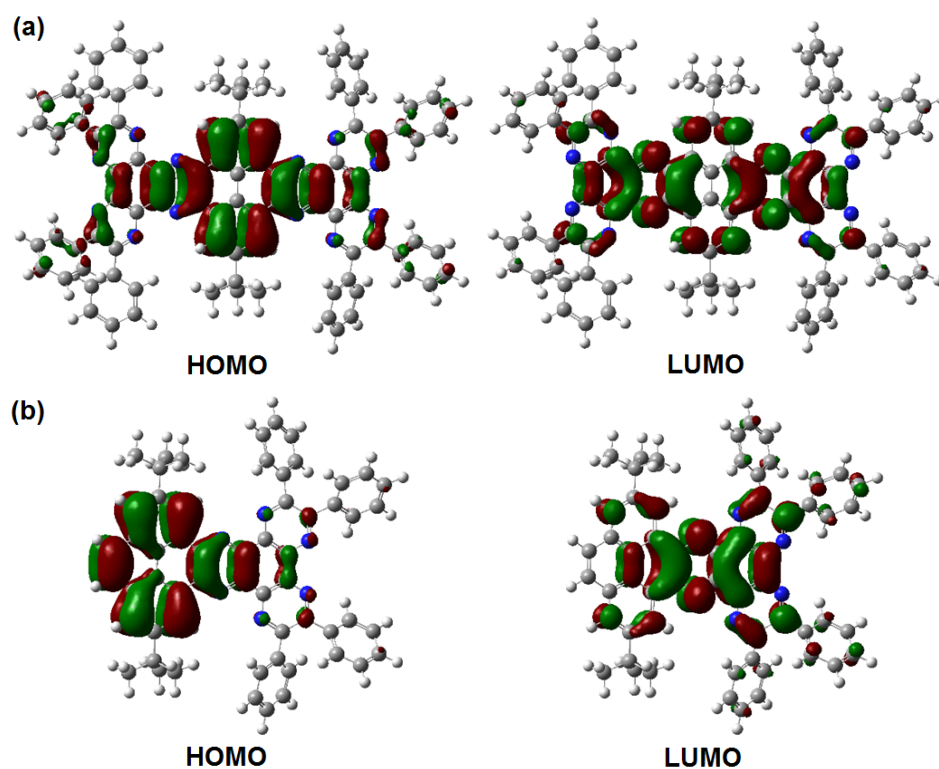

**Fig. S7** Interfacial plots of the HOMO and LUMO of compounds (a) **1** and (b) **2**. The molecular configurations of these compounds were optimized at B3LYP/6-31G(d) level previously. Gray, white and blue atoms of the molecular frameworks indicate the C, H and N atoms, respectively. Red and green parts on the interfacial plots refer to the different phases of the molecular wave functions, for which the isovalue is 0.02 au.

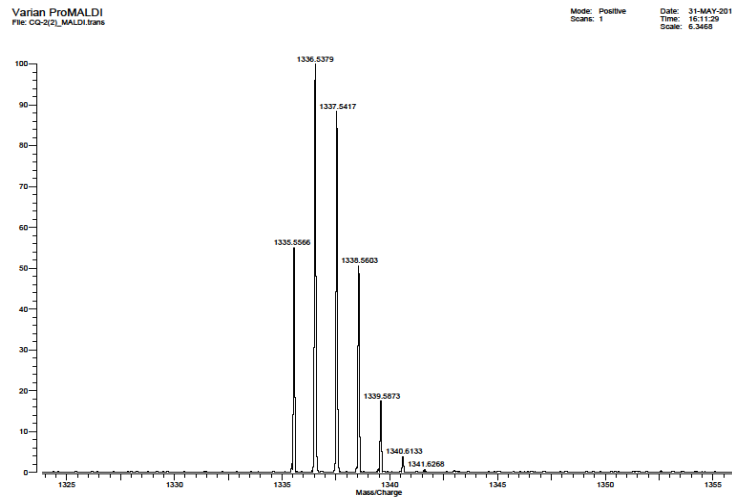

**Fig. S8** ESI-MS spectrum of compound 1.

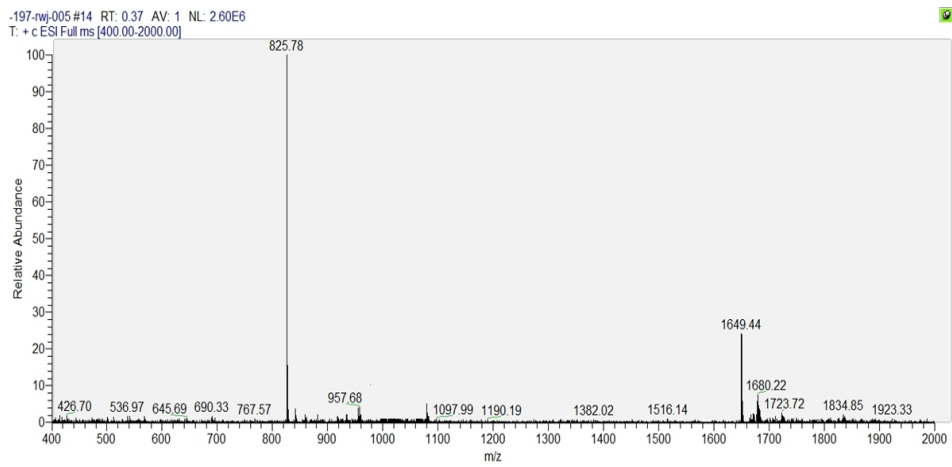

**Fig. S9** ESI-MS spectrum of compound 2.

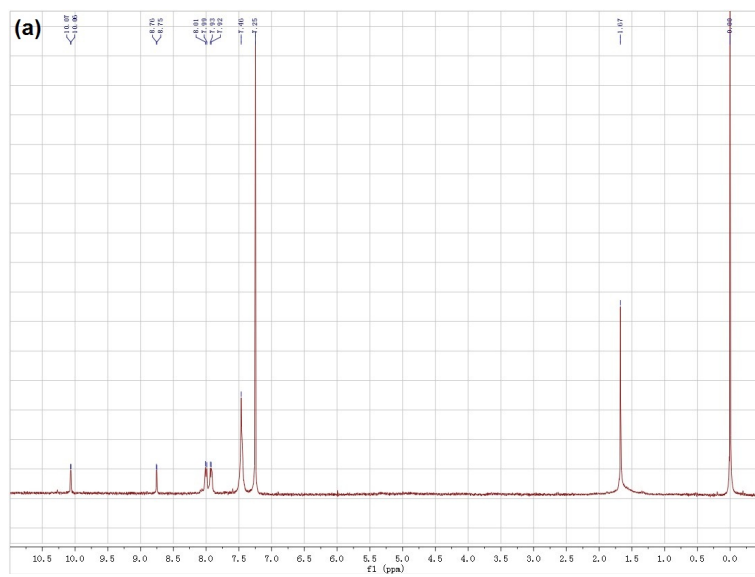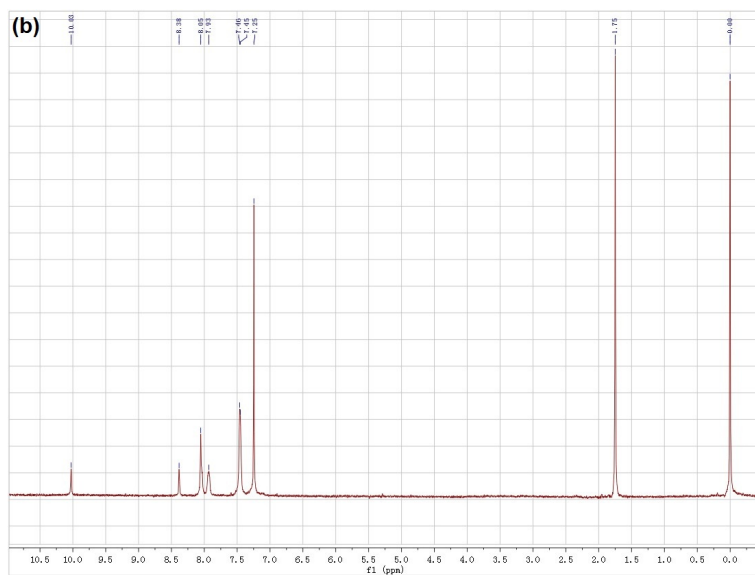

**Fig. S10** The  $^1\text{H}$  NMR spectra of (a) **1** and (b) **2**.



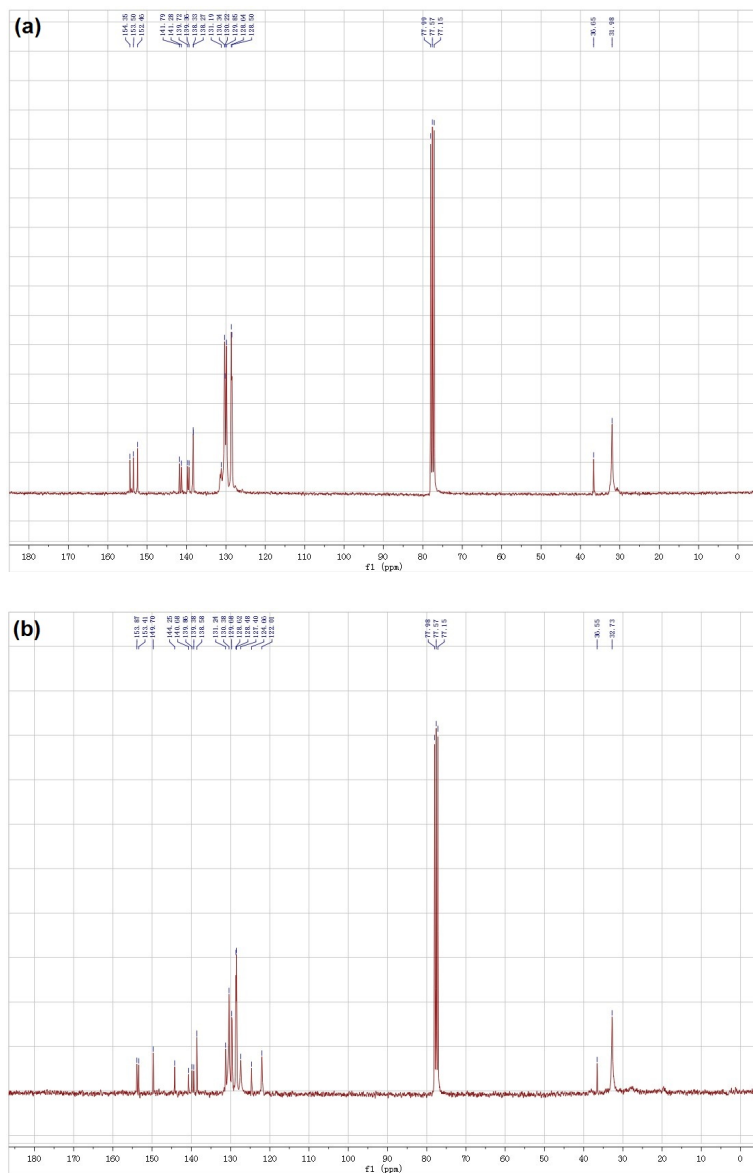

Fig. S11 The  $^{13}\text{C}$  NMR spectra of (a) **1** and (b) **2**.

## References

- 1 X.-H. Zhang, Q. Zhao, X.-M. Liu, T.-L. Hu, J. Han, W.-J. Ruan and X.-H. Bu, *Talanta*, 2013, **108**, 150.
- 2 J. Hu, D. Zhang and F. W. Harris, *J. Org. Chem.*, 2004, **70**, 707.
- 3 D. Z. Rogers, *J. Org. Chem.*, 1986, **51**, 3904.
- 4 R. Koteeswari, P. Ashokkumar, E. J. P. Malar, V. T. Ramakrishnan and P. Ramamurthy, *Chem. Commun.*, 2011, **47**, 7695.
- 5 A. Thakur, D. Mandal, P. Deb, B. Mondal and S. Ghosh, *RSC Adv.*, 2014, **4**, 1918.
- 6 Y.-J. Gong, X.-B. Zhang, Z. Chen, Y. Yuan, Z. Jin, L. Mei, J. Zhang, W. Tan, G.-L. Shen and R.-Q. Yu, *Analyst*, 2012, **137**, 932.
- 7 L. Wang, B. Zheng, Y. Zhao, J. Du and D. Xiao, *Anal. Methods*, 2012, **4**, 2369.
- 8 G. Sivaraman, T. Anand and D. Chellappa, *RSC Adv.*, 2012, **2**, 10605.
- 9 Y. Yan, R. Zhang, X. Yu and H. Xu, *ChemPlusChem*, 2014, **79**, 1676.
- 10 M. J. Culzoni, A. Muñoz de la Peña, A. Machuca, H. C. Goicoechea, R. Brasca and R. Babiano, *Talanta*, 2013, **117**, 288.
- 11 S. Areti, D. S. Yarramala, K. Samanta, V. K. Hinge, J. Khedkar and C. P. Rao, *RSC Adv.*, 2014, **4**, 16290.
- 12 V. Bhalla, V. Viji, R. Tejpal, G. Singh and M. Kumar, *Dalton Trans.*, 2013, **42**, 4456.
- 13 L.-J. Ma, J. Liu, L. Deng, M. Zhao, Z. Deng, X. Li, J. Tang and L. Yang, *Photochem. Photobio. Sci.*, 2014, **13**, 1521.
- 14 G. K. Wang, Q. L. Mi, L. Y. Zhao, J. J. Hu, L. E. Guo, X. J. Zou, B. Liu, X. G. Xie, J. F. Zhang, Q. H. Zhao and Y. Zhou, *Chem. Asian J.*, 2014, **9**, 744.
- 15 I. T. Ho, T.-L. Lai, R.-T. Wu, M.-T. Tsai, C.-M. Wu, G.-H. Lee and W.-S. Chung, *Analyst*, 2012, **137**, 5770.
- 16 M. Vedamalai and S.-P. Wu, *Org. Biomol. Chem.*, 2012, **10**, 5410.
- 17 K. Tayade, B. Bondhopadhyay, A. Basu, G. K. Chaitanya, S. K. Sahoo, N. Singh, S. Attarde and A. Kuwar, *Talanta*, 2014, **122**, 16.
- 18 Q.-Y. Cao, Y.-M. Han, H.-M. Wang and Y. Xie, *Dyes Pigments*, 2013, **99**, 798.
- 19 J. Weng, Q. Mei, B. Zhang, Y. Jiang, B. Tong, Q. Fan, Q. Ling and W. Huang, *Analyst*, 2013,

138, 6607.

- 20 N. Zhao, J. W. Y. Lam, H. H. Y. Sung, H. M. Su, I. D. Williams, K. S. Wong and B. Z. Tang, *Chem. Eur. J.*, 2014, **20**, 133.
- 21 Q. Mei, L. Wang, B. Tian, F. Yan, B. Zhang, W. Huang and B. Tong, *New J. Chem.*, 2012, **36**, 1879.
- 22 J. Choi, S. K. Lee, J. Bae and S.-K. Chang, *Tetrahedron Lett.*, 2014, **55**, 5294.
- 23 L. Praveen, J. Babu, M. L. P. Reddy and R. Luxmi Varma, *Tetrahedron Lett.*, 2012, **53**, 3951.
- 24 X.-J. Jiang, C.-L. Wong, P.-C. Lo and D. K. P. Ng, *Dalton Trans.*, 2012, **41**, 1801.
- 25 T. K. Khan and M. Ravikanth, *Dyes Pigments*, 2012, **95**, 89.
- 26 S. Wagner, K. Brödner, B. A. Coombs and U. H. F. Bunz, *Eur. J. Org. Chem.*, 2012, **2012**, 2237.
